# Supplementary material for: Land or sea? Foraging area choice during breeding by an omnivorous gull
Source: PubMed Central journal article supplement (PMC4868019; doi:10.1186/s40462-016-0078-5), 2016-05-15
Supplement: 40462_2016_78_MOESM1_ESM.pdf [file 40462_2016_78_MOESM1_ESM.pdf]

Additional file 1. Table of lesser black-backed gulls GPS deployments. GPS deployments on lesser black-backed gulls at Stora Karlsö (2011-2013) with number of foraging trips per individual per year included in analysis (see additional file 3 for raw data).

| <i>Ring Number</i> | <i>Head-bill<br/>(mm)</i> | <i>Sex</i> | <i>Date tagged</i> | <i>Number of foraging trips per year</i> |             |             |              |    |
|--------------------|---------------------------|------------|--------------------|------------------------------------------|-------------|-------------|--------------|----|
|                    |                           |            |                    | <i>2011</i>                              | <i>2012</i> | <i>2013</i> | <i>Total</i> |    |
| 8114315            | 120.3                     | M          | 2011-05-21         | 46                                       | 105         |             | 151          |    |
| 8114318            | 103                       | F          | 2011-05-25         | 46                                       |             |             | 46           | ‡  |
| 8114316            | 127                       | M          | 2011-05-22         | 27                                       | 2           |             | 29           |    |
| 8114317            | 116.1                     | M          | 2011-05-23         | 14                                       |             |             | 14           | ‡  |
| 8114319            | 115.8                     | M          | 2011-05-25         |                                          |             |             |              | *  |
| 8114314            | 104.5                     | F          | 2011-05-21         | 17                                       | 41          | 39          | 97           |    |
| 8114320            | 121.4                     | M          | 2011-05-25         | 11                                       |             |             | 11           | ‡  |
| 8114321            | 118.5                     | M          | 2011-05-25         | 15                                       |             |             | 15           | ‡  |
| 8114312            | -                         | F          | 2011-05-20         | 11                                       |             |             | 11           | †‡ |
| 8114313            | 117.8                     | M          | 2012-05-21         | 56                                       | 105         |             | 161          |    |
| 8111155            | 124.2                     | M          | 2012-06-01         |                                          | 52          | 59          | 111          |    |
| 8111250            | 107.85                    | F          | 2012-06-03         |                                          | 47          | 88          | 135          |    |
| 8114370            | 118.65                    | M          | 2012-05-31         |                                          | 36          |             | 36           |    |
| 8111177            | 119.4                     | M          | 2012-05-31         |                                          | 37          | 56          | 93           |    |
| 8114371            | 106.5                     | F          | 2012-06-05         |                                          | 63          |             | 63           |    |
| 8111176            | 121                       | M          | 2012-06-05         |                                          | 51          |             | 51           |    |
| 8114348            | 116.62                    | M          | 2013-06-01         |                                          |             | 61          | 61           |    |
| 8114345            | 117.16                    | M          | 2013-05-27         |                                          |             | 69          | 69           |    |
| 8114349            | 117.11                    | M          | 2013-06-03         |                                          |             | 22          | 22           |    |
| 8114347            | 102.63                    | F          | 2013-06-01         |                                          |             | 33          | 33           |    |
| 8114346            | 117.99                    | M          | 2013-05-31         |                                          |             |             |              | *  |
| <i>Total</i>       |                           |            |                    | 243                                      | 539         | 427         | 1209         |    |

\* No data because of tag failure/ breeding abandonment

† Head-bill measurement not taken. Observed to be smaller member of pair, thus assumed female

‡ Not included in pre-laying analysis for 2012-2013 due to lack of data
