# Supplementary material for: Land or sea? Foraging area choice during breeding by an omnivorous gull
Source: PubMed Central journal article supplement (PMC4868019; doi:10.1186/s40462-016-0078-5), 2016-05-15

**Additional file 6**

Random effect terms of the individual tracked gull individuals for model 18 in Table 1. These show the increased (positive values) or decreased (negative values) probability of the 19 GPS tracked lesser black-backed gulls to forage on land for the finally selected statistical model together with 95% confidence intervals. Female (black) and male (red) gulls are indicated with colors.

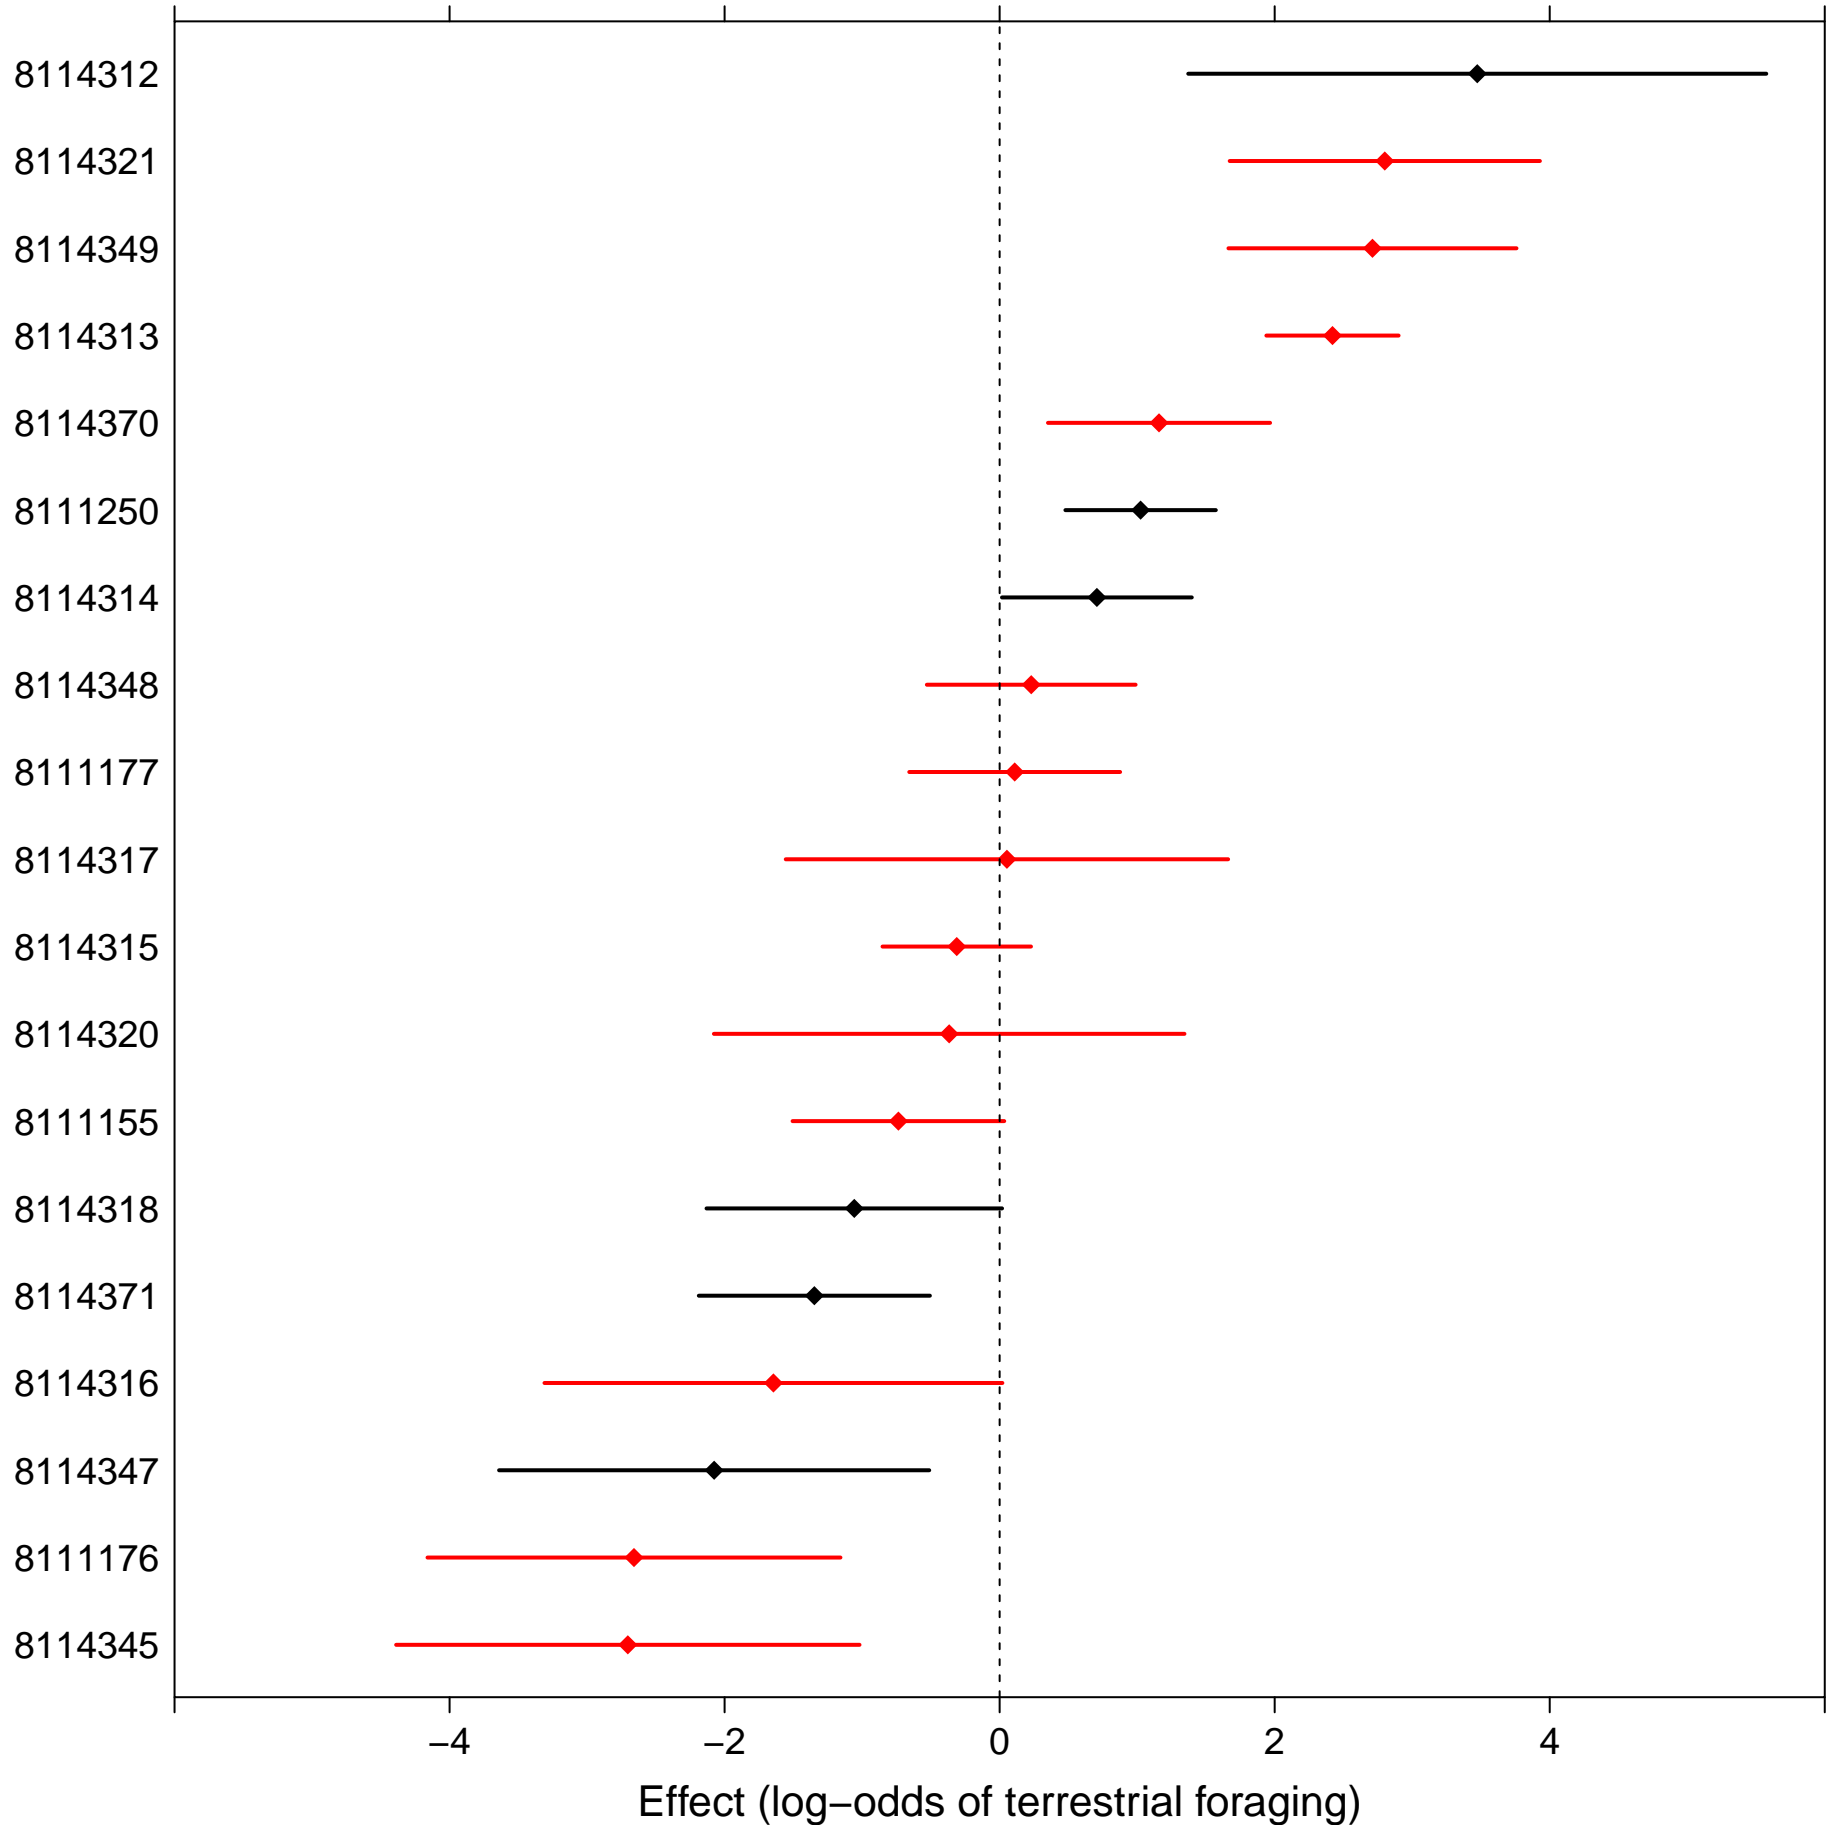

Supplement: 40462_2016_78_MOESM6_ESM.pdf [file 40462_2016_78_MOESM6_ESM.pdf]
