# Supplementary material for: Land or sea? Foraging area choice during breeding by an omnivorous gull
Source: PubMed Central journal article supplement (PMC4868019; doi:10.1186/s40462-016-0078-5), 2016-05-15

**Additional file 8**

Proportion of land (green), sea (blue), or mixed (magenta) foraging trips by GPS tracked gulls divided by year. Extended version of Fig 4 a (main paper), showing proportion of foraging trips of different classes through breeding period for 5-day periods. The breeding stages are indicated (vertical broken grey lines). Note in 2011 there were no pre-laying trips recorded, as the first gulls were tagged during incubation.

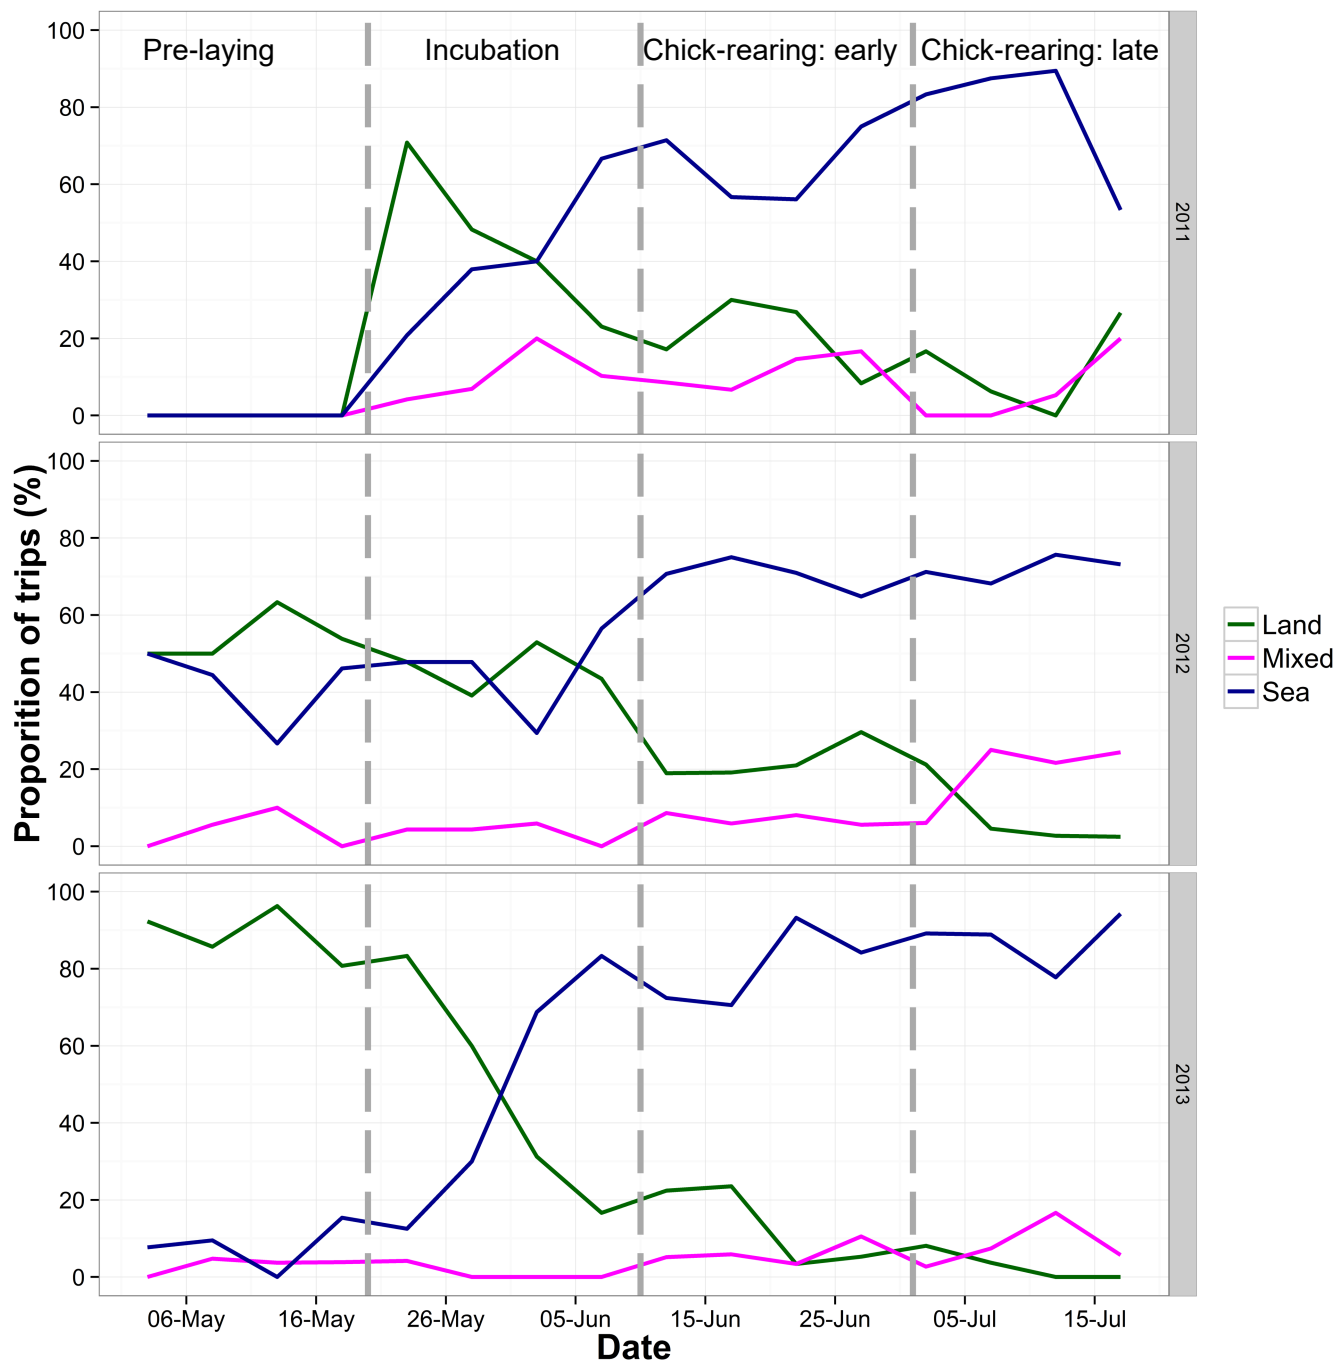

Supplement: 40462_2016_78_MOESM8_ESM.pdf [file 40462_2016_78_MOESM8_ESM.pdf]
